# Supplementary material for: Delayed Macronutrients’ Target Achievement in Parenteral Nutrition Reduces the Risk of Hyperglycemia in Preterm Newborn: A Randomized Controlled Trial
Source: MDPI journal article supplement (doi:10.3390/nu15051279), 2023-03-04
Supplement: s1 [file s1]

## Supplementary Materials

**Table S1.** Binary logistic regression analysis to evaluate the influence of covariates on the occurrence of bronchopulmonary dysplasia.

| Variables                           | $\beta$ | S.E.  | Wald   | <i>p</i> value | Odds ratio (OR) | 95 C.I for OR |        |
|-------------------------------------|---------|-------|--------|----------------|-----------------|---------------|--------|
|                                     |         |       |        |                |                 | Lower         | Upper  |
| ELBW °                              | 2.749   | 0.818 | 11.283 | 0.001*         | 15.625          | 3.14          | 77.70  |
| IUGR±                               | -4.05   | 0.905 | 0.200  | 0.655          | 0.667           | 0.11          | 3.93   |
| Male sex                            | 0.039   | 0.600 | 0.427  | 0.513          | 1.480           | 0.457         | 4.80   |
| Group assignment                    | 1.050   | 0.664 | 2.496  | 0.114          | 2.857           | 0.777         | 10.506 |
| Culture-proven sepsis               | 0.048   | 0.734 | 0.004  | 0.948          | 1.049           | 0.25          | 4.42   |
| Mechanical ventilation <sup>§</sup> | 2.138   | 0.840 | 6.479  | 0.011          | 8.48            | 1.63          | 44.00  |

Notes. ELBW = birth weight < 1000 grams; ±IUGR = intrauterine growth restriction; <sup>§</sup>duration > 7 DoL

\**p* < 0.05

**Table S2.** Binary logistic regression analysis to evaluate the influence of covariates on the occurrence of retinopathy of prematurity.

| Variables                      | $\beta$ | S.E.  | Wald   | <i>p</i> value | Odds ratio (OR) | 95 C.I for OR |        |
|--------------------------------|---------|-------|--------|----------------|-----------------|---------------|--------|
|                                |         |       |        |                |                 | Lower         | Upper  |
| GA °                           | 1.872   | 0.564 | 11.018 | 0.001*         | 6.500           | 2.152         | 19.630 |
| IUGR±                          | 0.092   | 0.508 | 0.033  | 0.856          | 1.096           | 0.405         | 2.97   |
| Group assignment               | -0.923  | 0.389 | 5.623  | 0.018*         | 0.397           | 0.185         | 0.852  |
| Culture-proven sepsis          | 0.578   | 0.472 | 1.502  | 0.220          | 1.782           | 0.707         | 4.492  |
| Blood transfusion <sup>§</sup> | 1.542   | 0.379 | 16.586 | 0.000*         | 4.673           | 2.225         | 9.813  |

Notes. °GA = gestational age < 30 weeks; ±IUGR = intrauterine growth restriction; <sup>§</sup>at least one during hospital stay. \**p* < 0.05

**Table S3.** Binary logistic regression analysis to evaluate the influence of covariates on the occurrence of sepsis.

| Variables                              | $\beta$ | S.E.  | Wald   | <i>p</i> value | Odds ratio (OR) | 95 C.I for OR |        |
|----------------------------------------|---------|-------|--------|----------------|-----------------|---------------|--------|
|                                        |         |       |        |                |                 | Lower         | Upper  |
| ELBW °                                 | 0.733   | 0.446 | 2.699  | 0.100          | 2.082           | 0.868         | 4.995  |
| IUGR±                                  | 0.103   | 0.496 | 0.043  | 0.835          | 1.109           | 0.419         | 2.934  |
| Antenatal corticosteroids <sup>§</sup> | -0.323  | 0.392 | 0.679  | 0.410          | 0.724           | 0.336         | 1.560  |
| Group assignment                       | 1.386   | 0.405 | 11.682 | 0.001          | 3.998           | 1.806         | 8.852  |
| CVA <sup>δ</sup>                       | 1.837   | 0.640 | 8.245  | 0.004*         | 6.279           | 1.792         | 22.004 |

Notes. °ELBW = birth weight < 1000 grams; ±IUGR = intrauterine growth restriction; <sup>§</sup>An intramuscular steroids cycle in two doses of 12 mg over a 24-hour period; <sup>δ</sup>CVA = central vascular access > 7 DoL. \**p* < 0.05

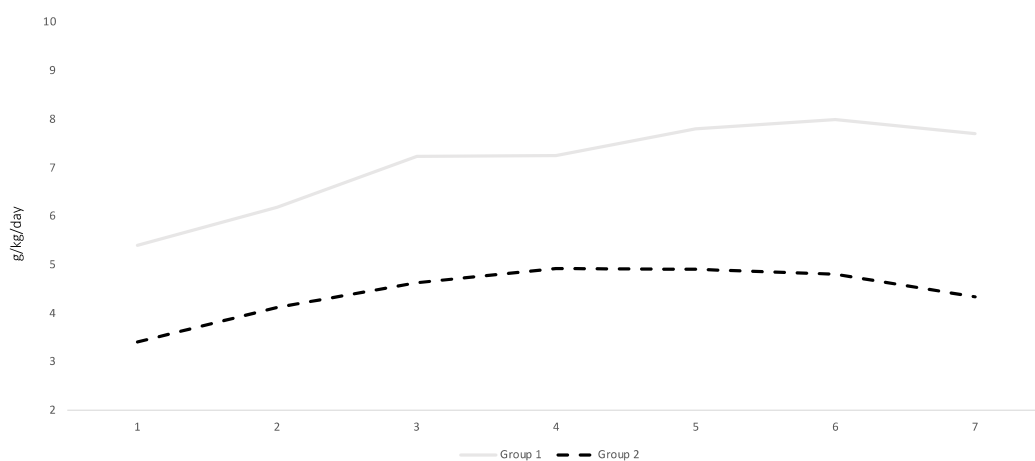

**Figure S1:** rate of increase of dextrose, within the first week of life, in the two study Groups.

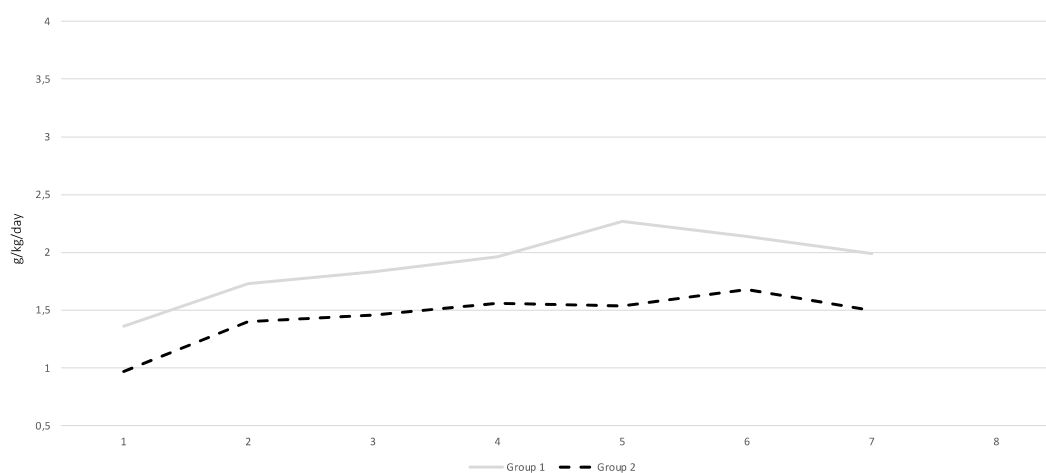

**Figure S2:** rate of increase of amino acids, within the first week of life, in the two study Groups.

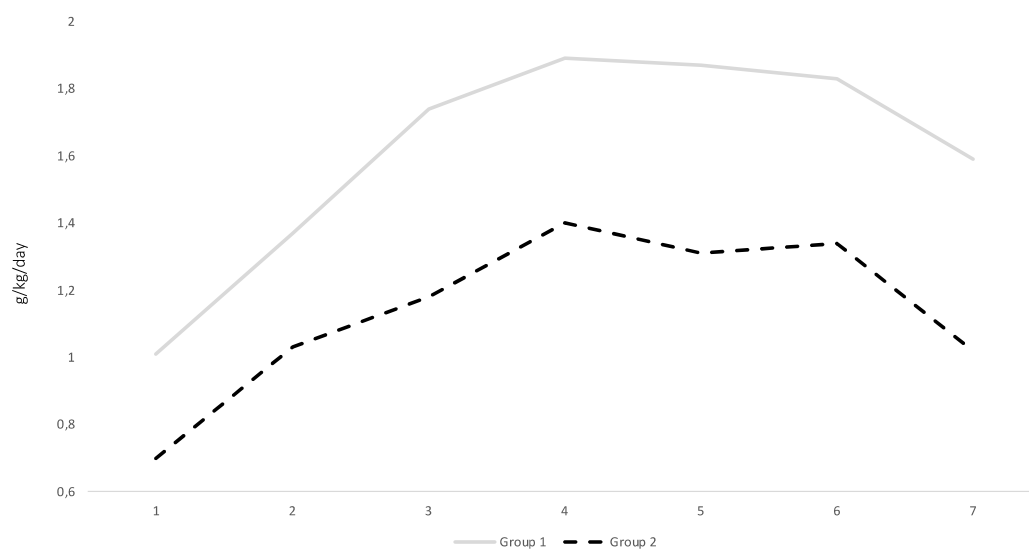

**Figure S3:** rate of increase of lipids, within the first week of life, in the two study Groups.
